# Supplementary material for: Statistical tests to compare motif count exceptionalities
Source: Springer Nature journal article supplement (doi:10.1186/1471-2105-8-84), 2007-03-08

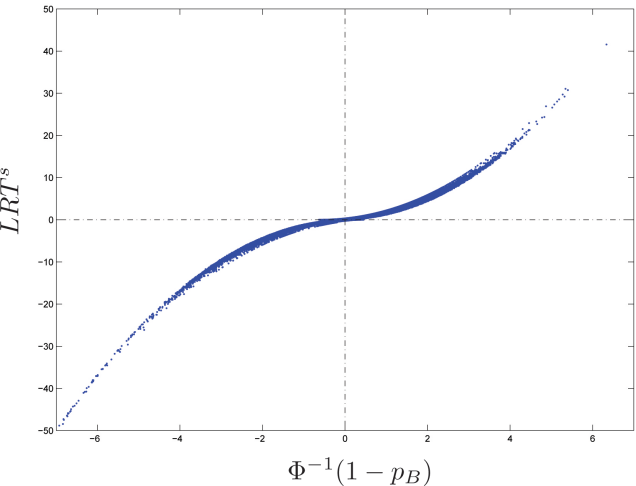

Supplement: 12859_2006_1456_MOESM5_ESM.pdf [file 12859_2006_1456_MOESM5_ESM.pdf]
